# Supplementary material
Source: MDPI journal article supplement (https://www.mdpi.com/2073-4344/12/8/889)
Supplement: s1 [file s1]

# Regioselective Synthesis of Novel Functionalized Dihydro-1,4-thiaselenin-2-ylsufanyl Derivatives Under Phase Transfer Catalysis

Andrey S. Filippov, Svetlana V. Amosova, Alexander I. Albanov and Vladimir A. Potapov \*

A. E. Favorsky Irkutsk Institute of Chemistry, Siberian Division of The Russian Academy of Sciences,  
1 Favorsky Str., Irkutsk 664033, Russia;

[filippov@irioch.irk.ru](mailto:filippov@irioch.irk.ru) (A.S.F.); [amosova@irioch.irk.ru](mailto:amosova@irioch.irk.ru) (S.V.A.); [albanov@irioch.irk.ru](mailto:albanov@irioch.irk.ru) (A.I.A.)

\*Correspondence: [v.a.potapov@mail.ru](mailto:v.a.potapov@mail.ru)

## Table of Contents

|                                                                                      |      |
|--------------------------------------------------------------------------------------|------|
| General Information                                                                  | 2    |
| $^1\text{H}$ -, $^{13}\text{C}$ -, and $^{77}\text{Se}$ -NMR spectra of the products | 3-19 |

## General Information

The  $^1\text{H}$  (400.1 MHz),  $^{13}\text{C}$  (100.6 MHz),  $^{77}\text{Se}$  (76.3 MHz), and  $^{15}\text{N}$  (40.6 MHz) NMR spectra (the spectra can be found in Supplementary Materials) were recorded on a Bruker DPX-400 spectrometer (Bruker BioSpin GmbH, Rheinstetten, Germany) in  $\text{CDCl}_3$  or  $\text{DMSO-}d_6$  solutions and referred to the residual solvent peaks of  $\text{CDCl}_3$  ( $\delta = 7.27$  and  $77.0$  ppm),  $\text{DMSO-}d_6$  ( $\delta = 2.50$  and  $39.5$  ppm) for  $^1\text{H}$ - and  $^{13}\text{C}$ -NMR, respectively), and dimethyl selenide ( $^{77}\text{Se}$ -NMR).

# <sup>1</sup>H-, <sup>13</sup>C-, and <sup>77</sup>Se-NMR spectra of the products

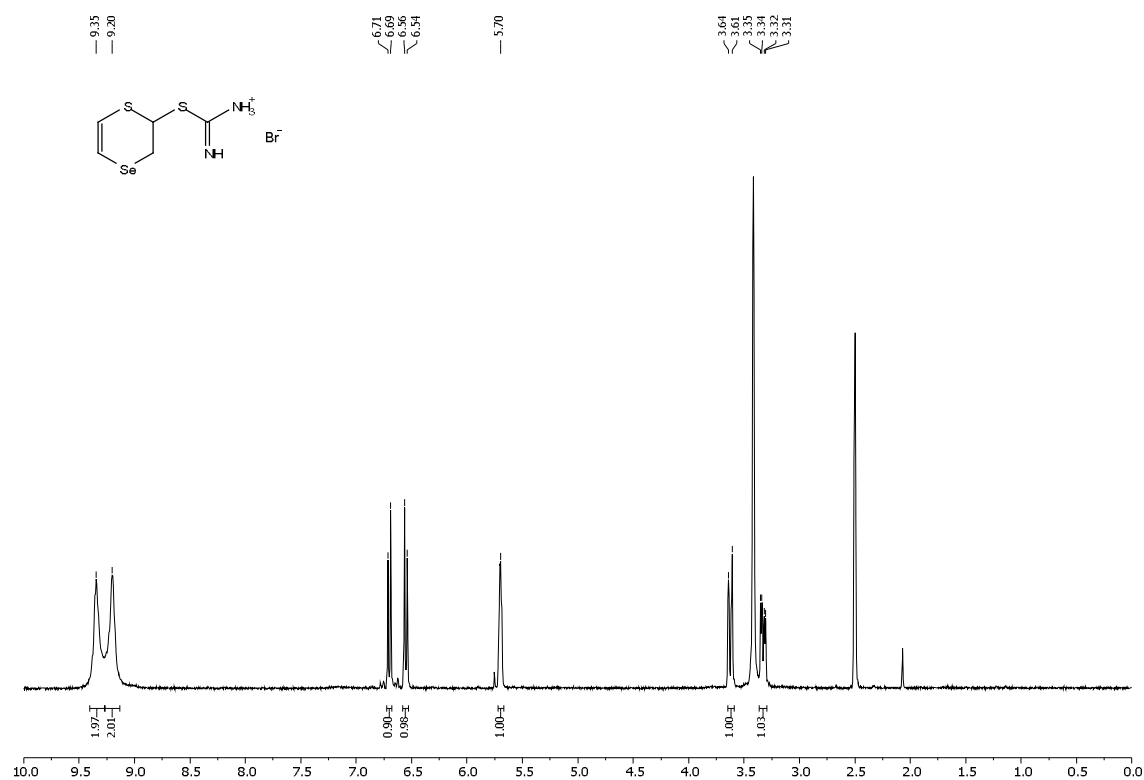

<sup>1</sup>H-NMR spectrum (DMSO-*d*<sub>6</sub>) of 2-[amino(imino)methyl]sulfanyl-2,3-dihydro-1,4-thiaselenine hydrobromide (2)

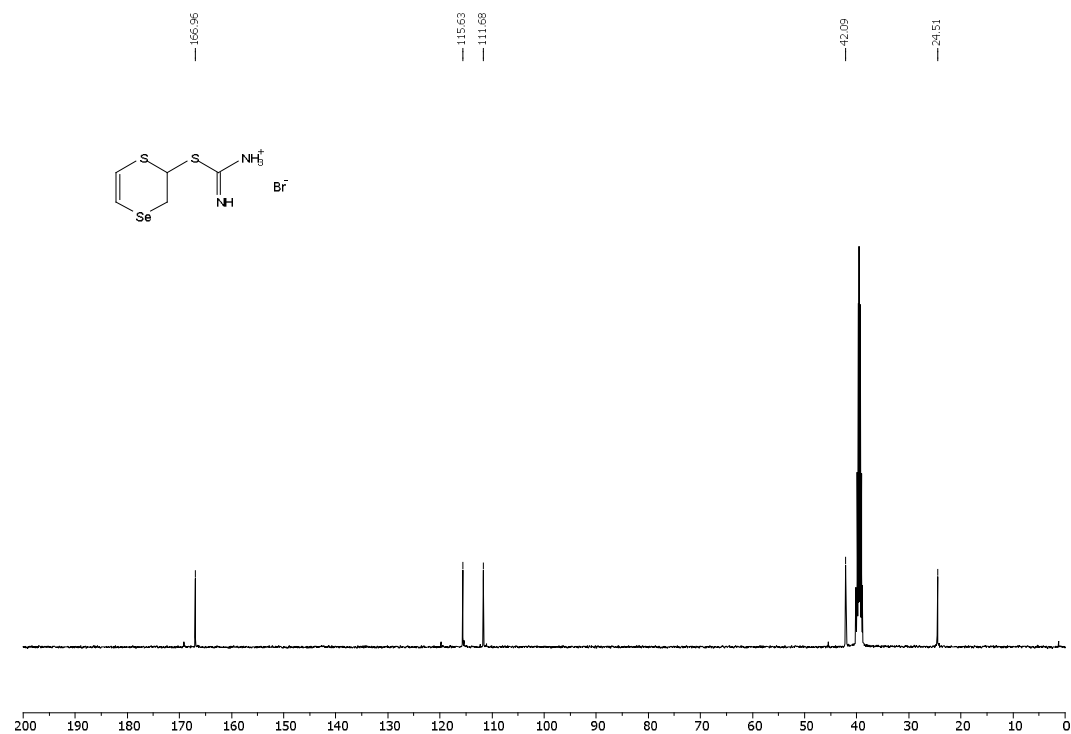

<sup>13</sup>C-NMR spectrum (DMSO-*d*<sub>6</sub>) of 2-[amino(imino)methyl]sulfanyl-2,3-dihydro-1,4-thiaselenine hydrobromide (2)

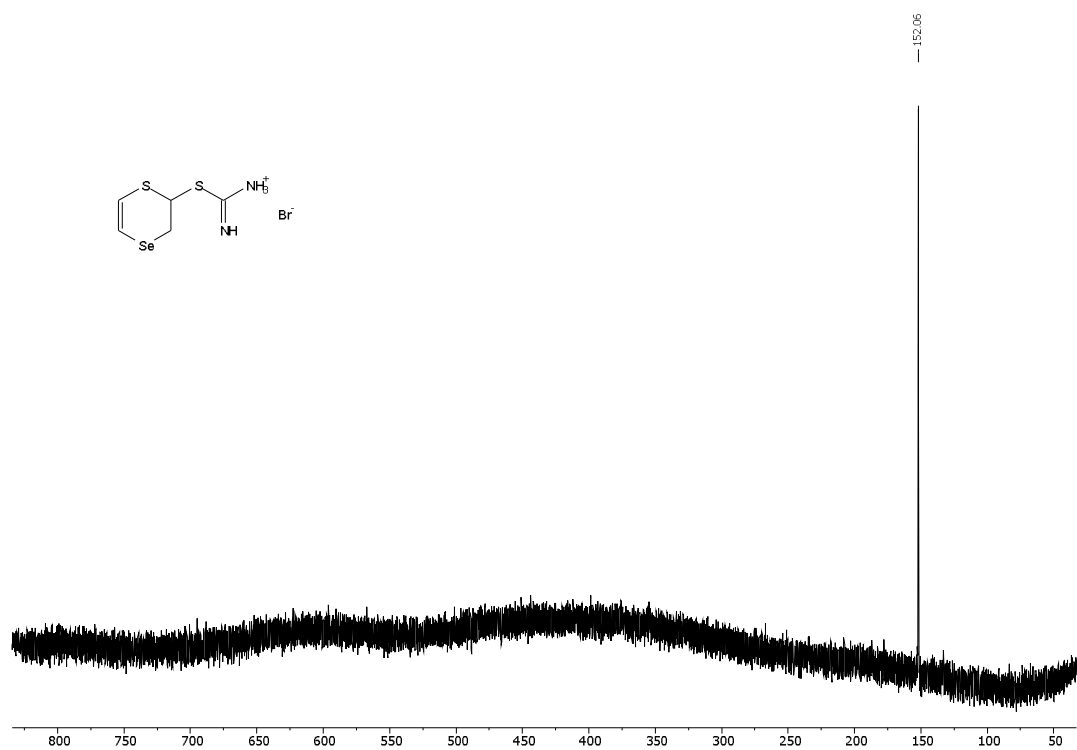

<sup>77</sup>Se-NMR spectrum (DMSO-*d*<sub>6</sub>) of 2-[amino(imino)methyl]sulfanyl-2,3-dihydro-1,4-thiaselenine hydrobromide (2)

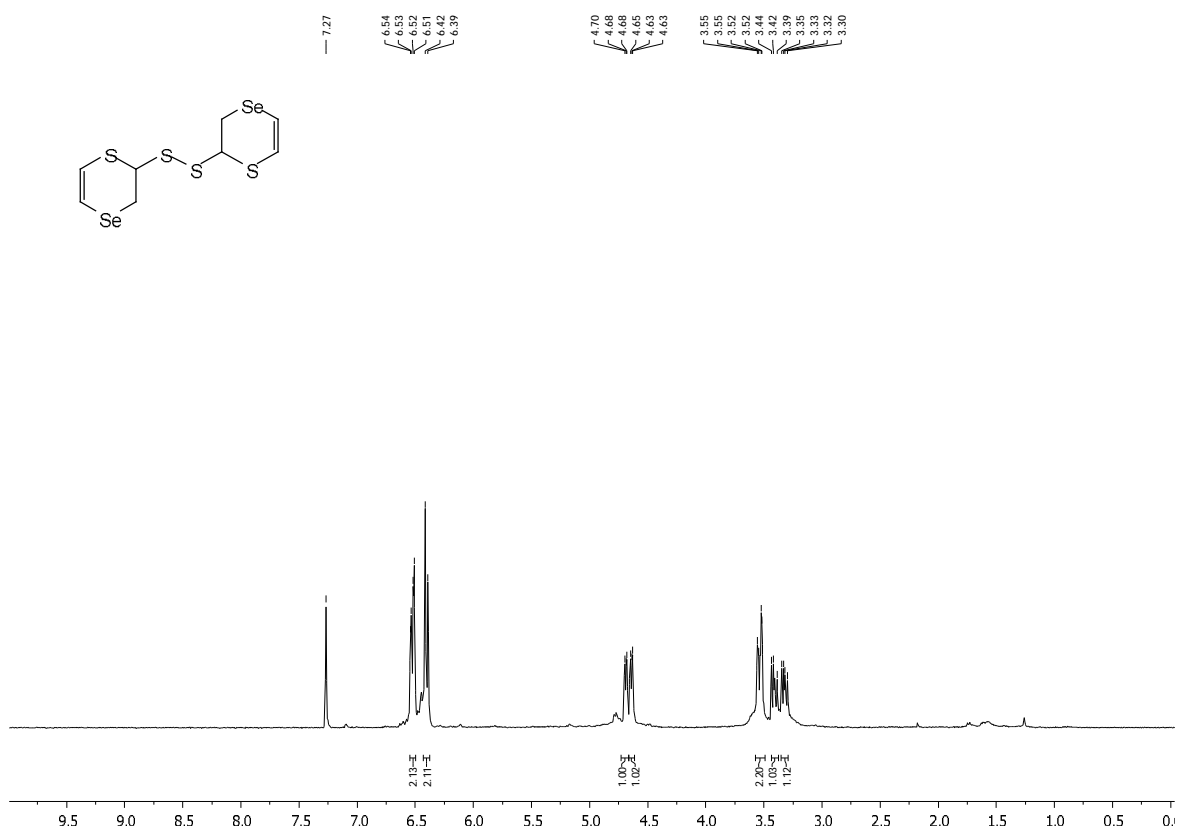

<sup>1</sup>H-NMR spectrum of bis(2,3-dihydro-1,4-thiaselenin-2-yl) disulfide (5)

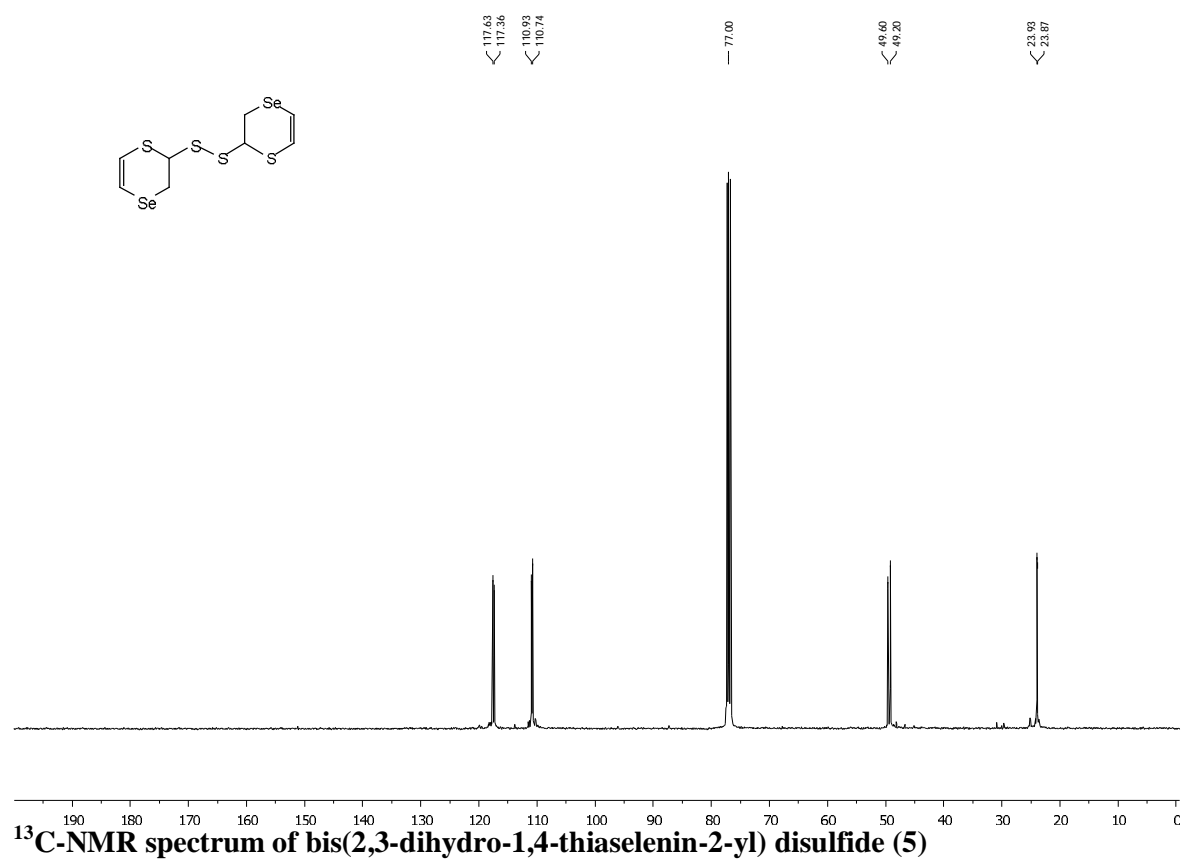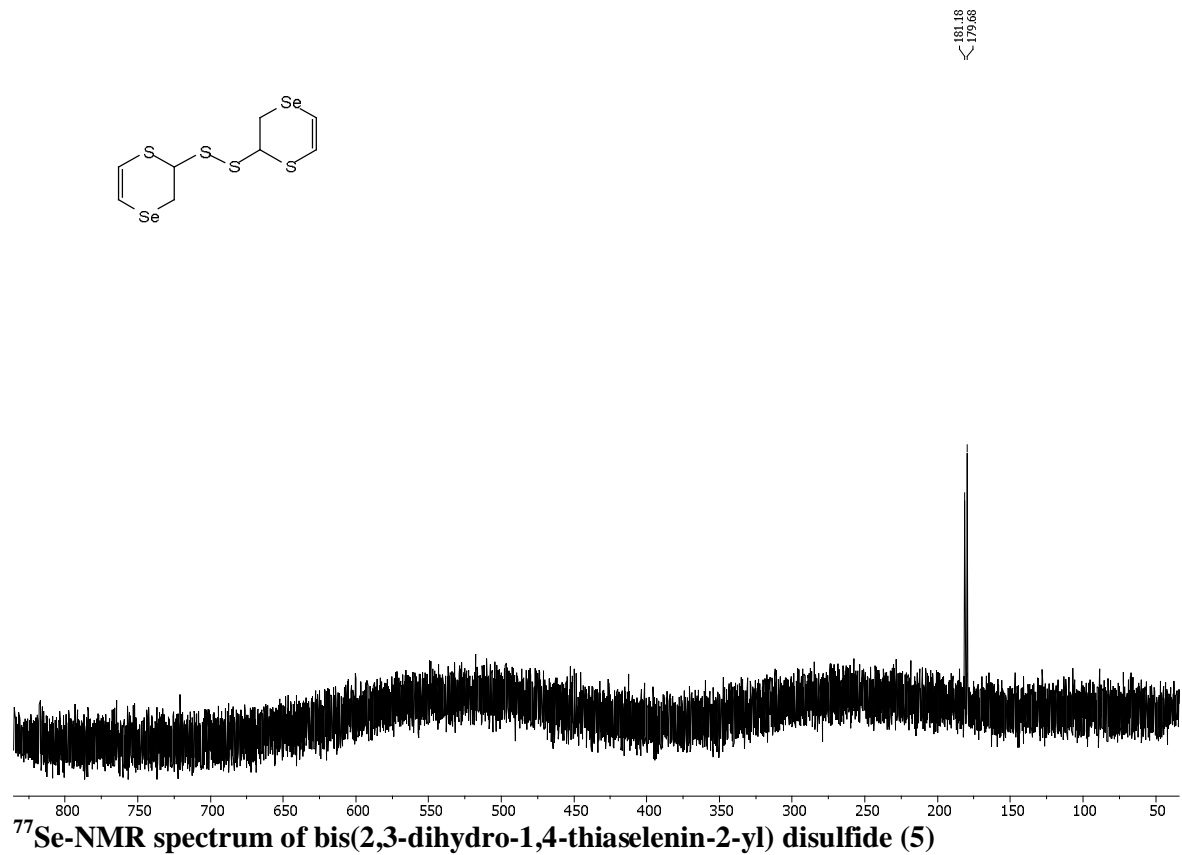

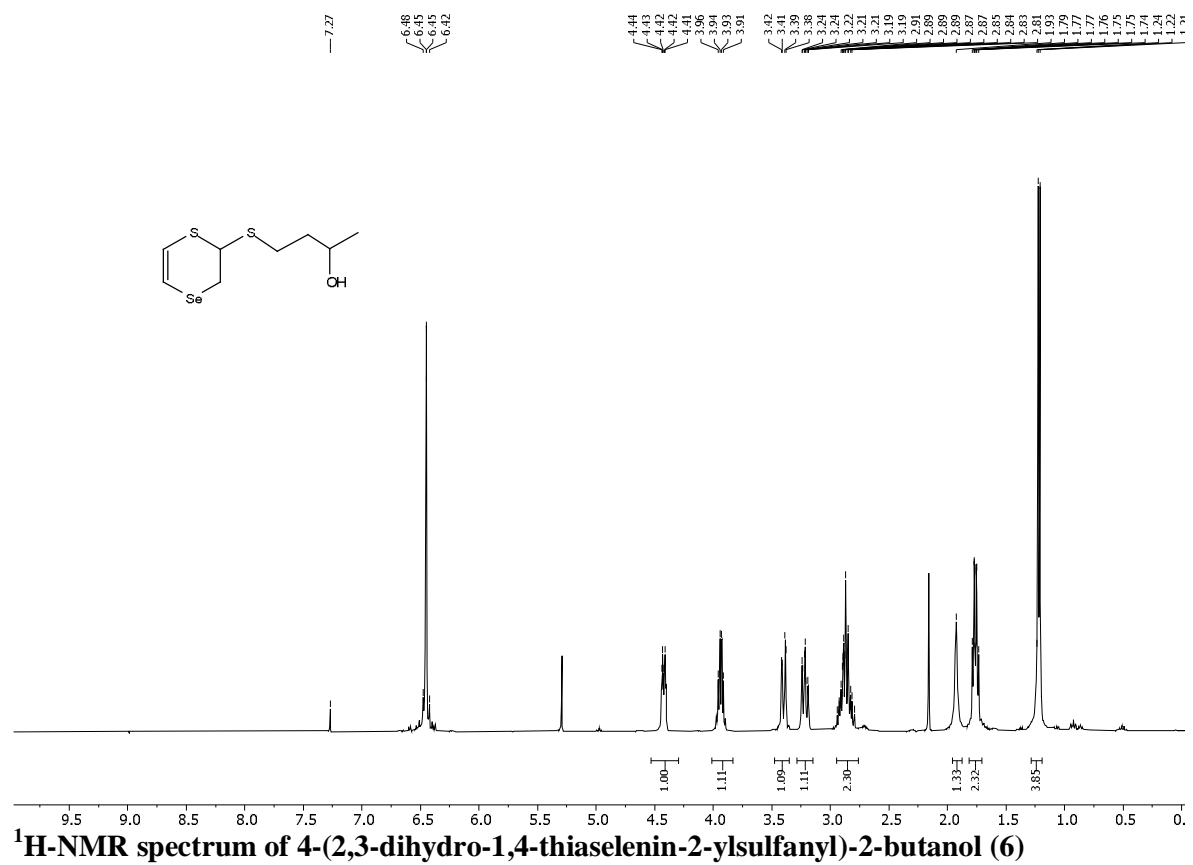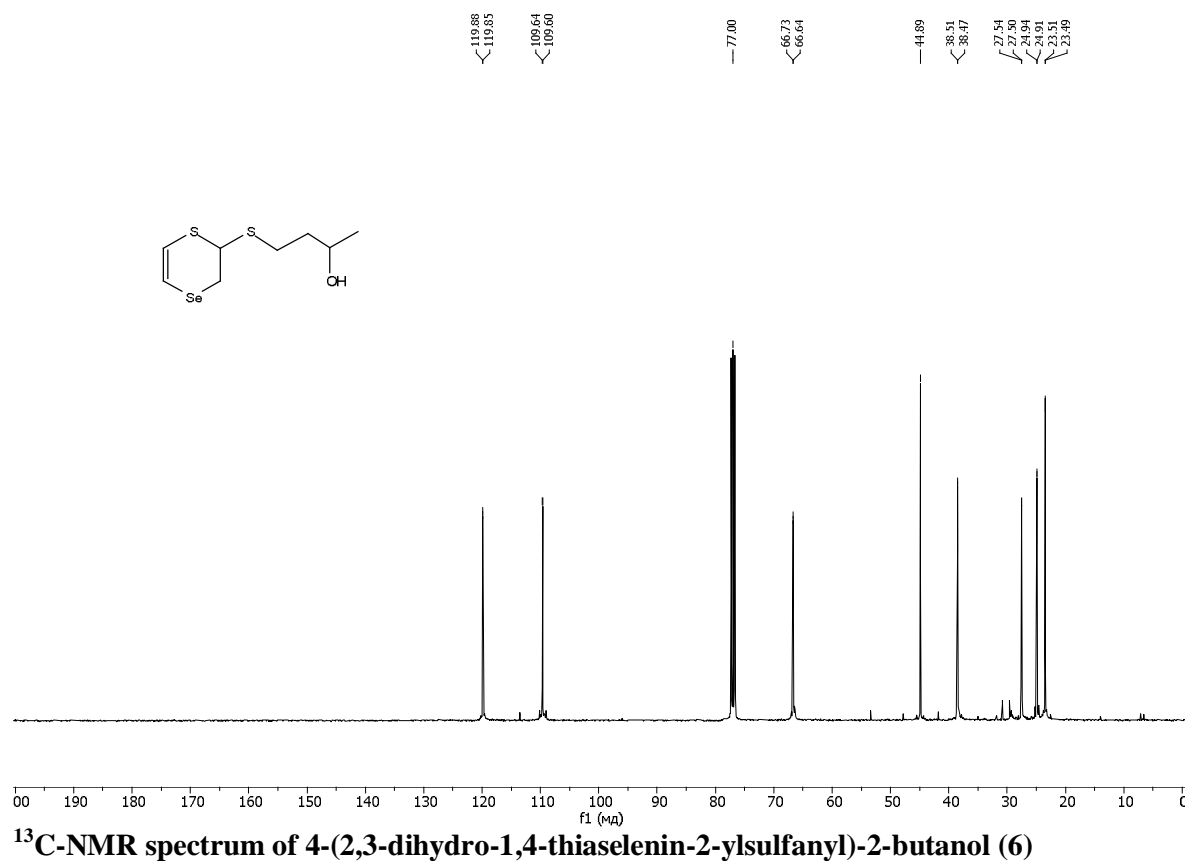

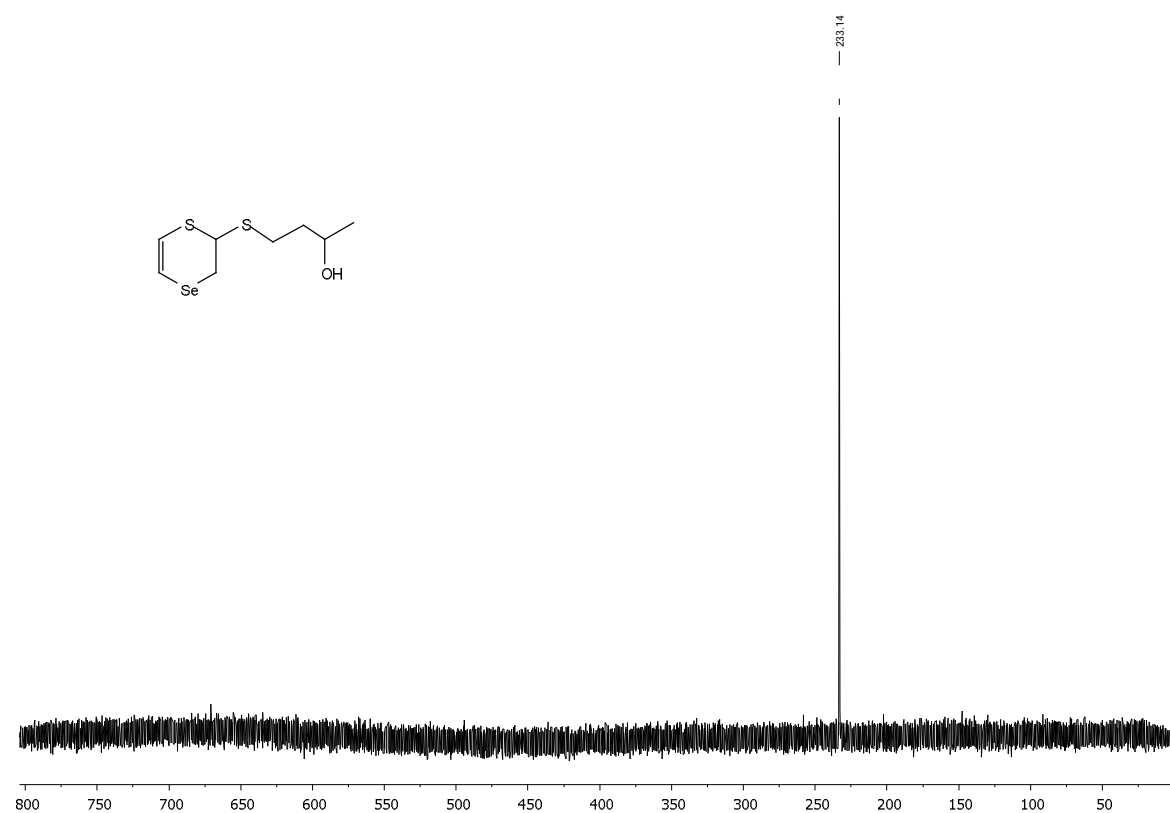

$^{77}\text{Se}$ -NMR spectrum of 4-(2,3-dihydro-1,4-thiaselenin-2-ylsulfanyl)-2-butanol (6)

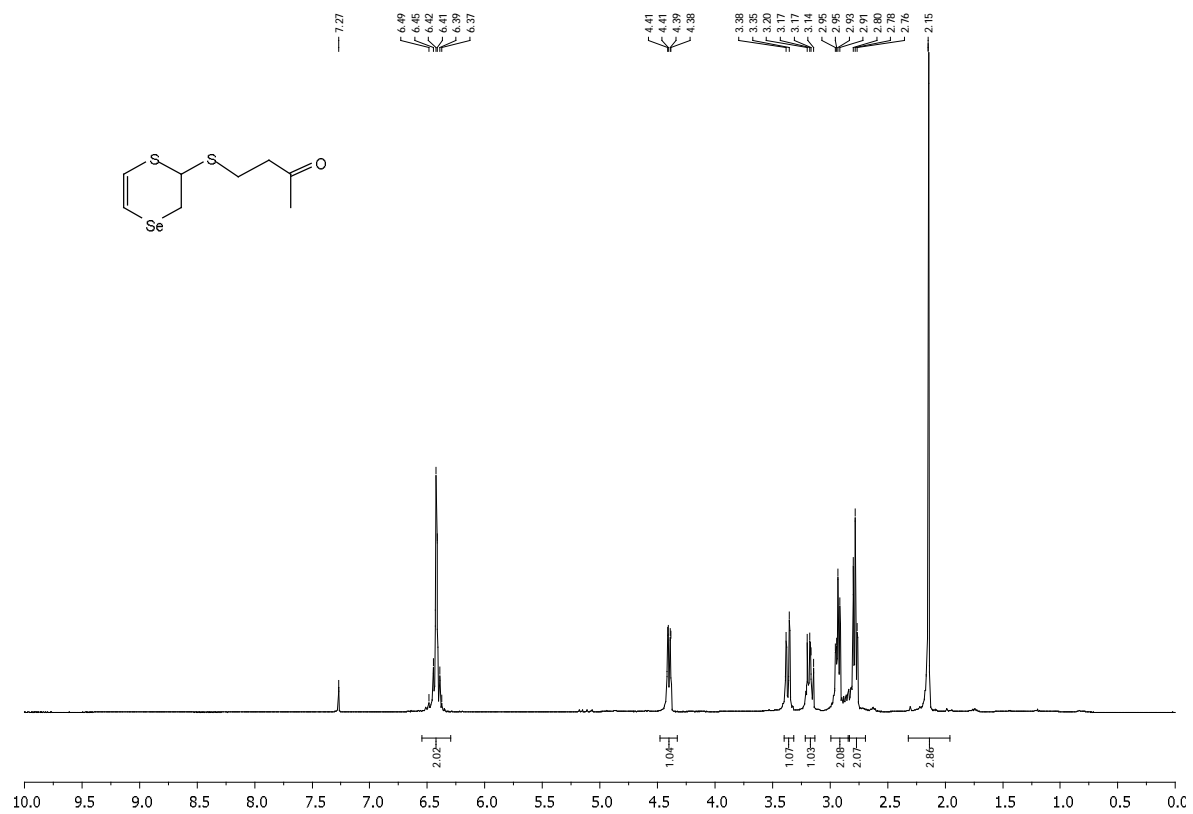

$^1\text{H}$ -NMR spectrum of 4-(2,3-dihydro-1,4-thiaselenin-2-ylsulfanyl)-2-butanone (7)

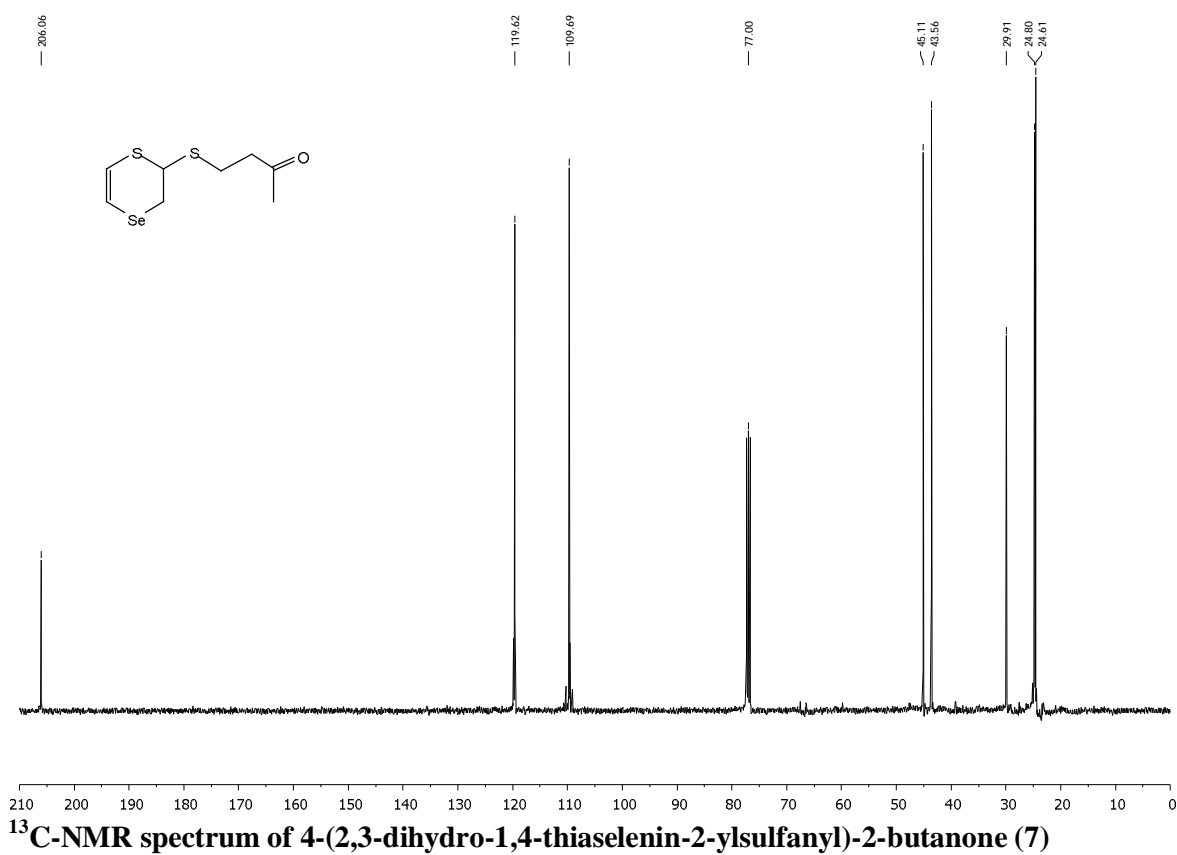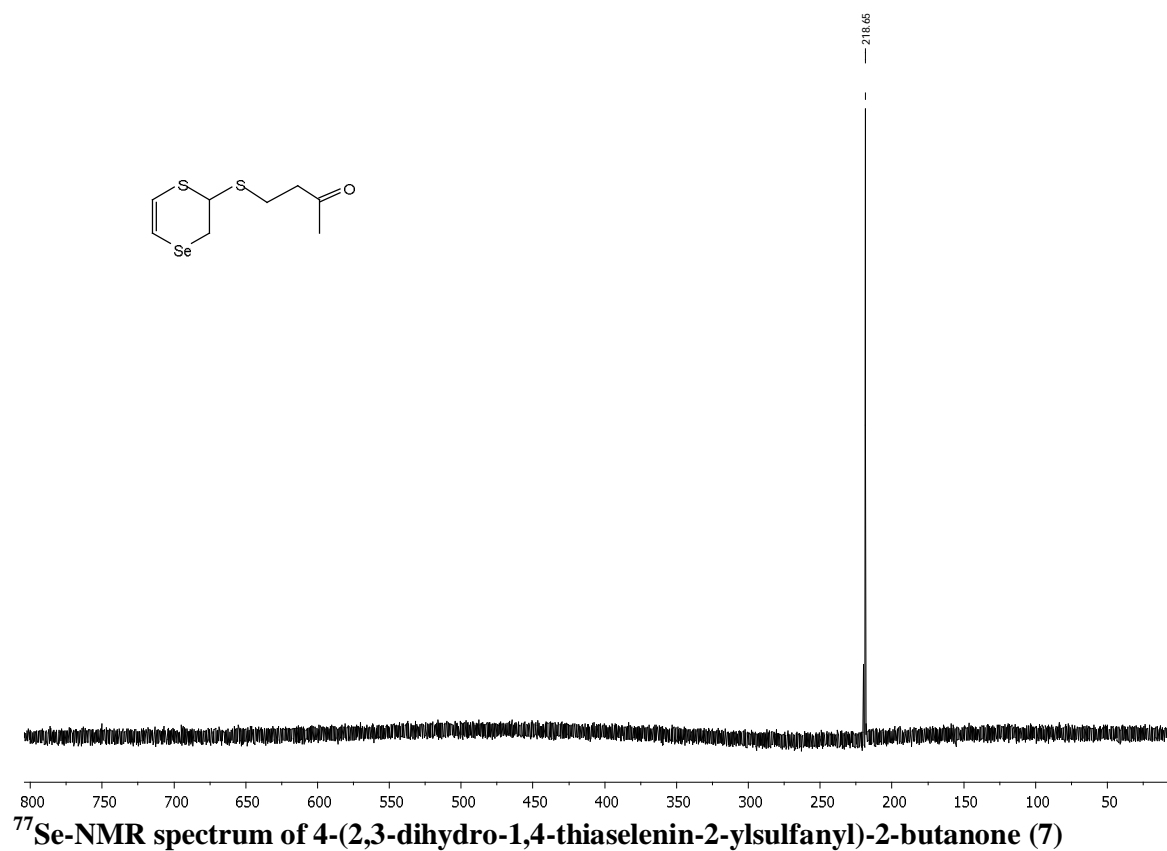



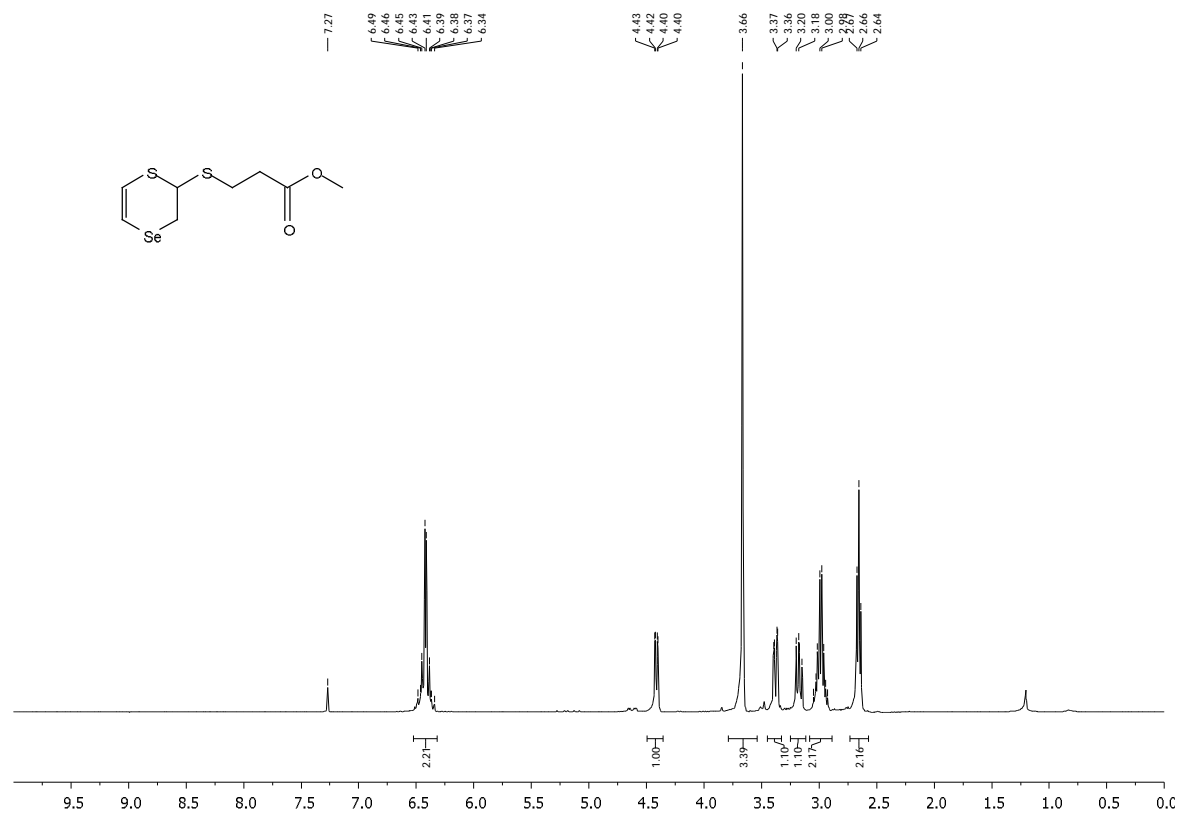

**<sup>1</sup>H-NMR spectrum of methyl 3-(2,3-dihydro-1,4-thiaselenin-2-ylsulfanyl)propanoate (8)**

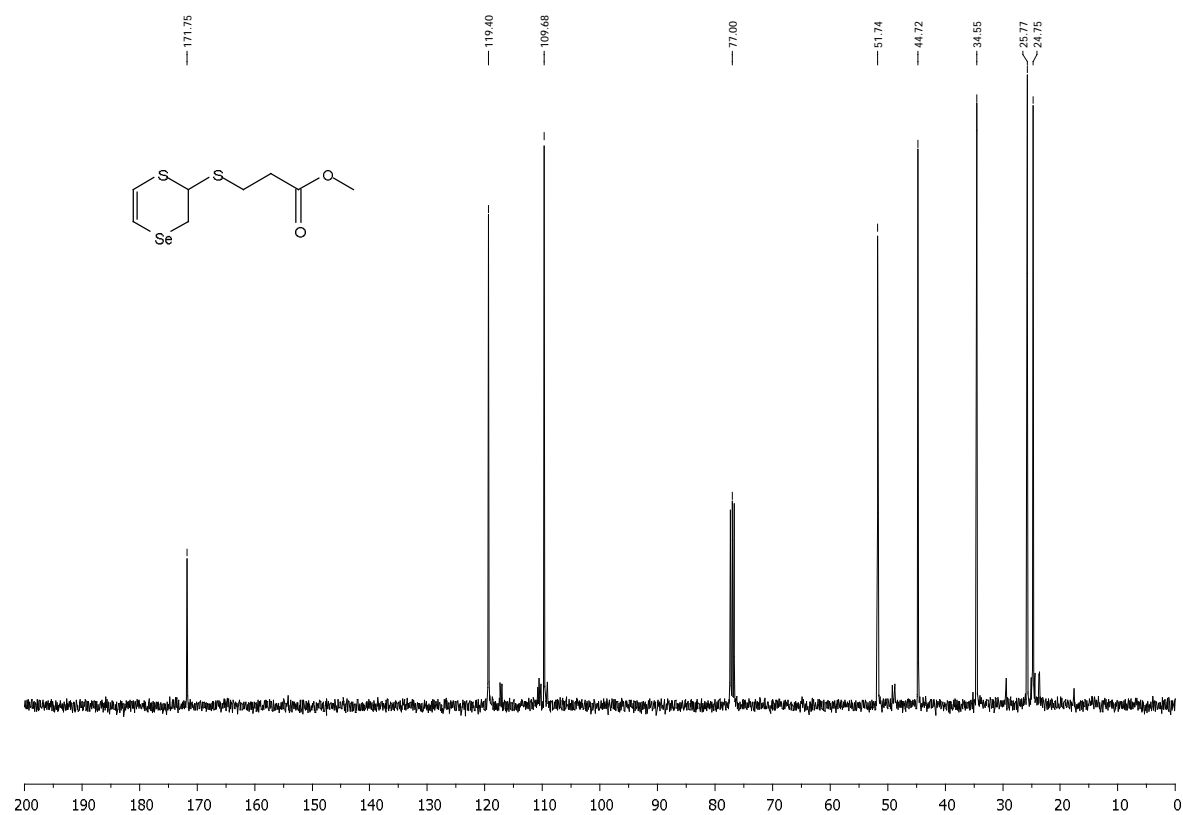

**<sup>13</sup>C-NMR spectrum of methyl 3-(2,3-dihydro-1,4-thiaselenin-2-ylsulfanyl)propanoate (8)**

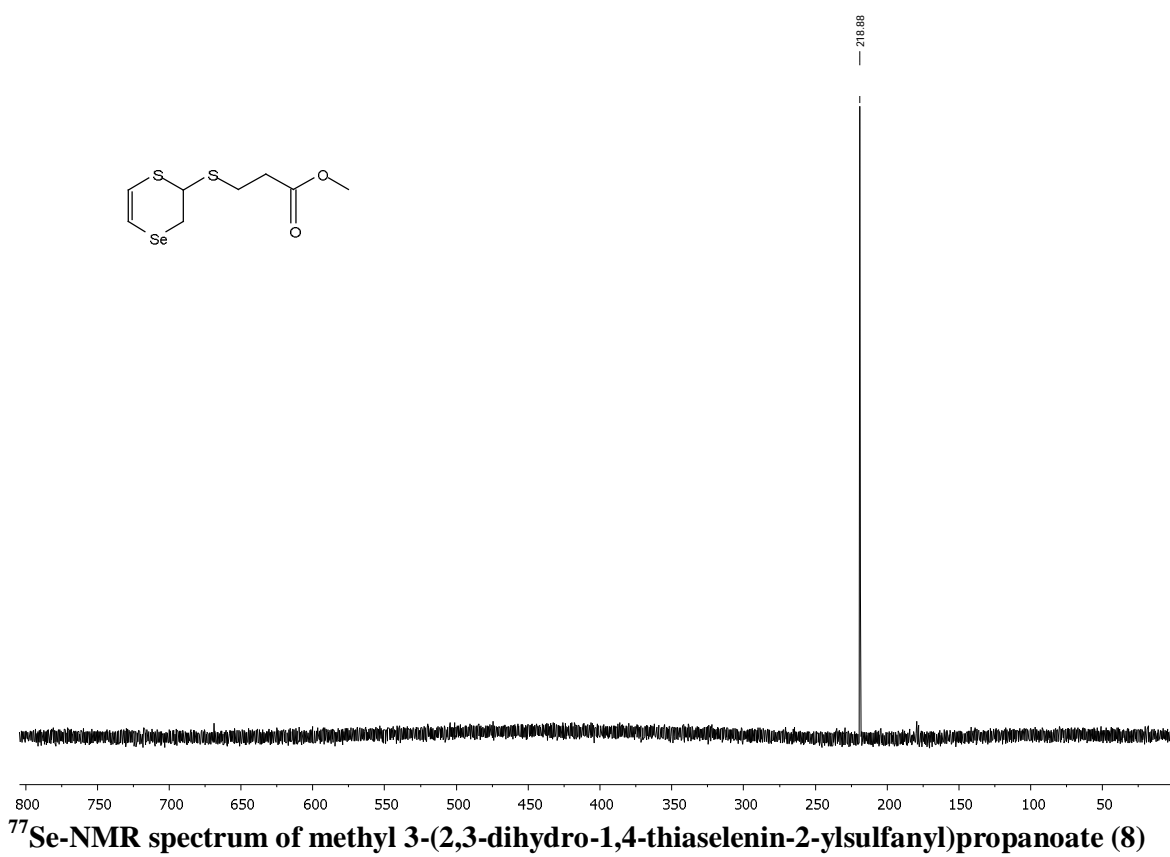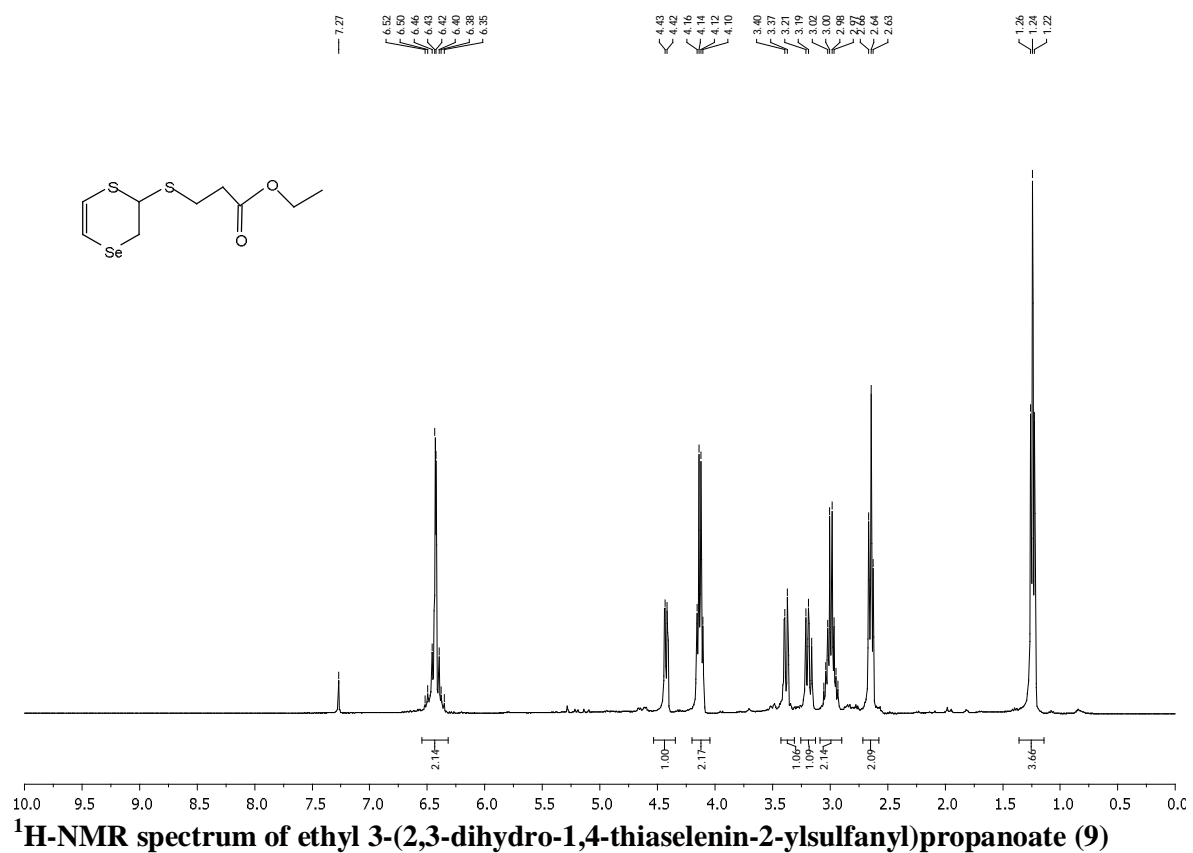

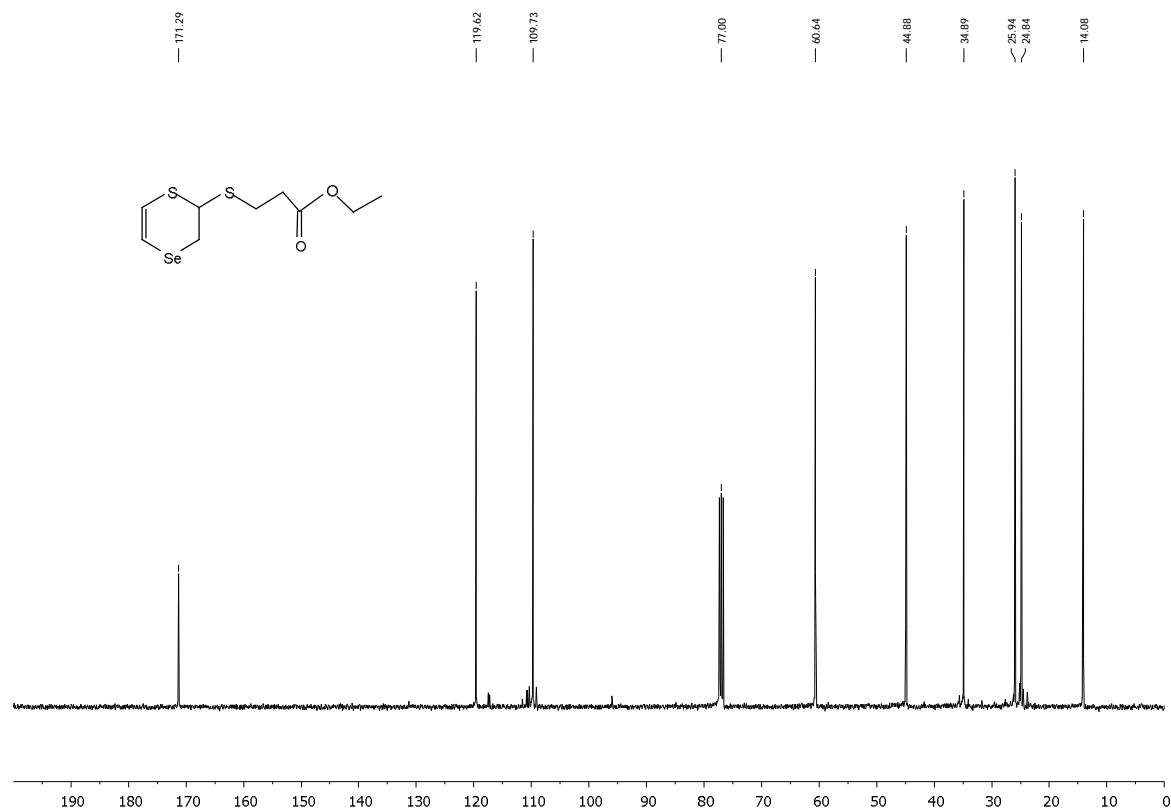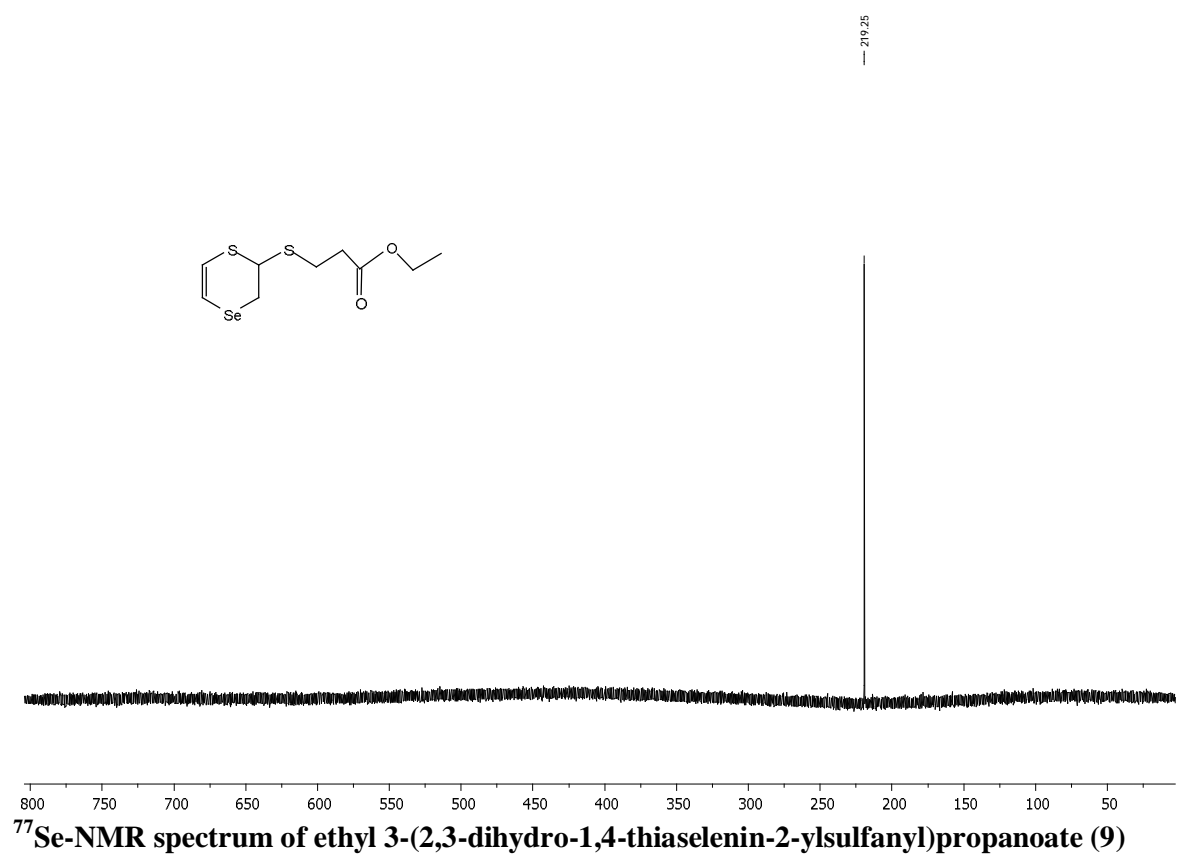

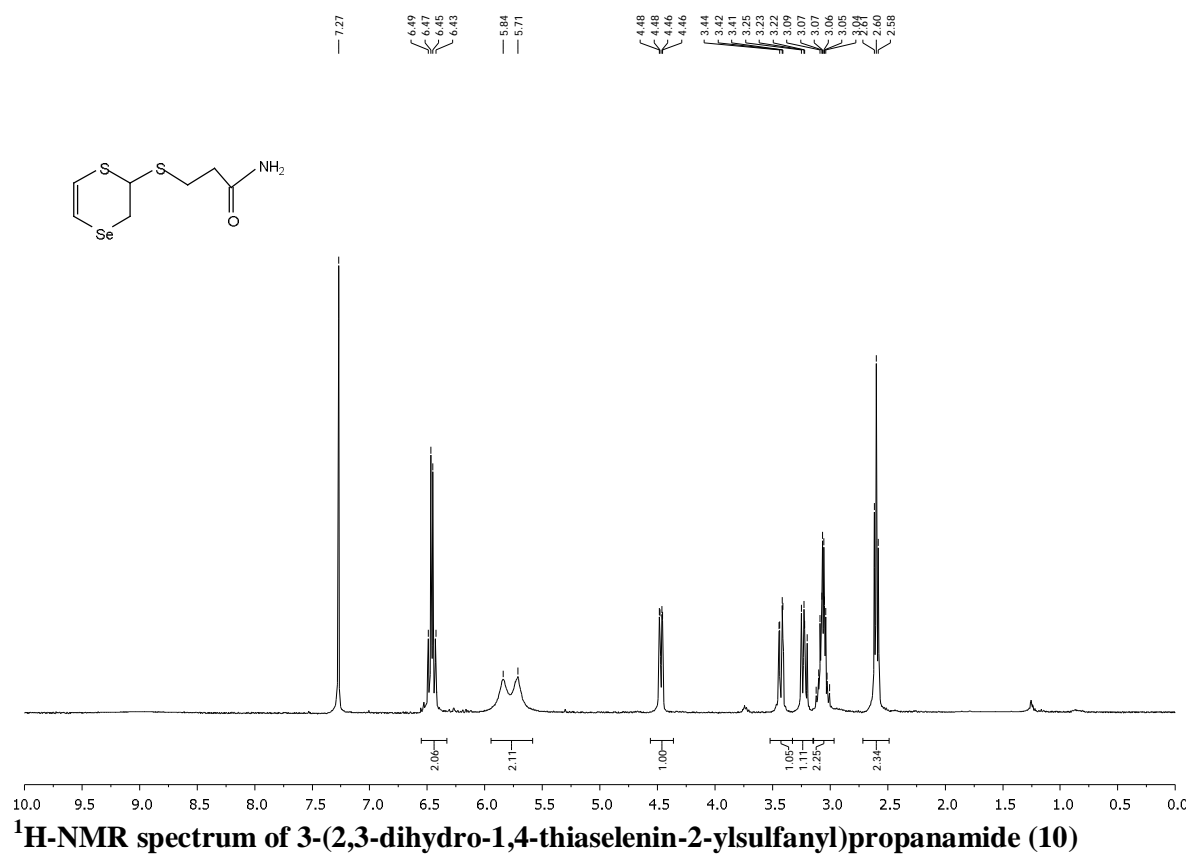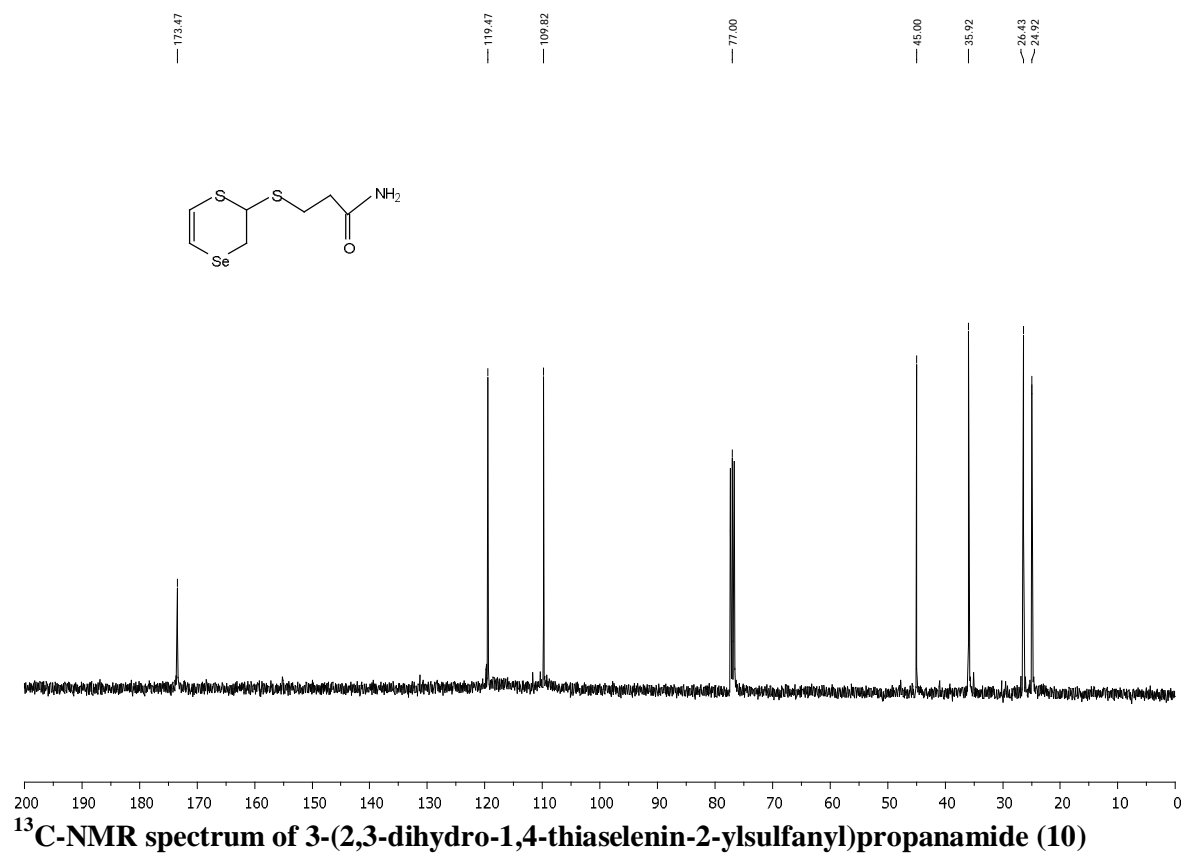

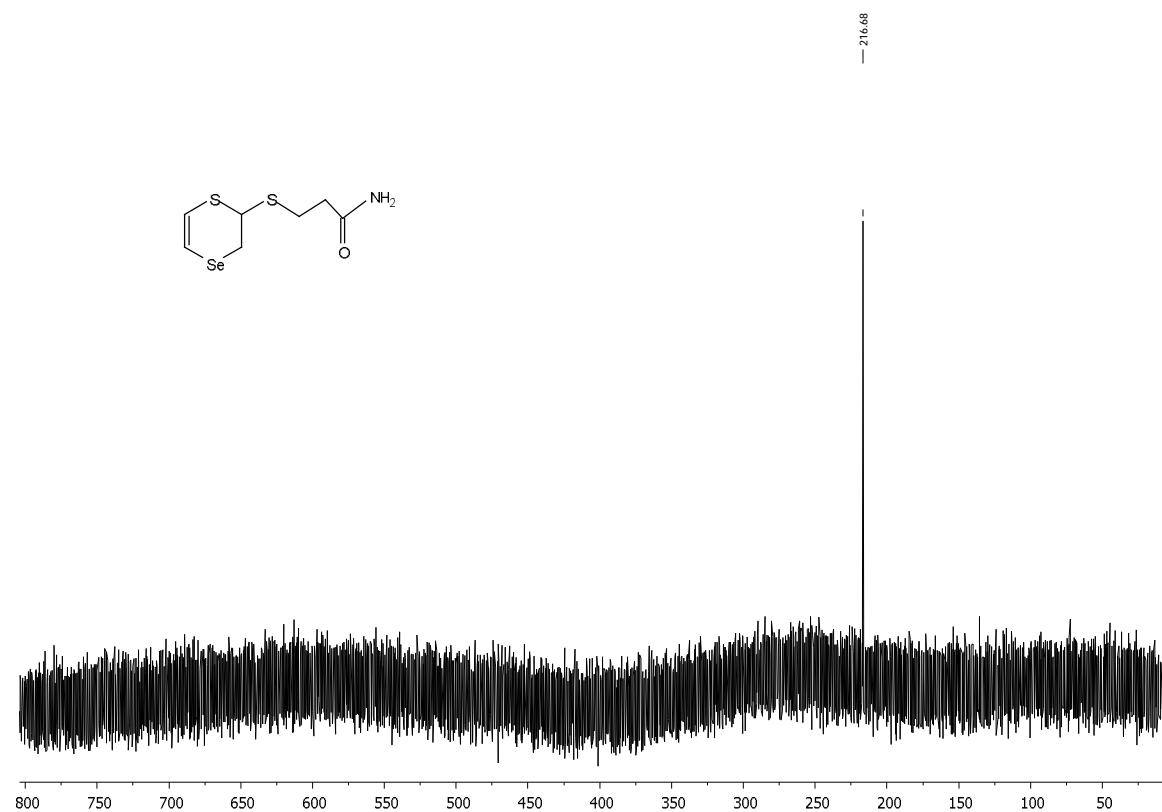

**<sup>77</sup>Se-NMR spectrum of 3-(2,3-dihydro-1,4-thiaselenin-2-ylsulfanyl)propanamide (10)**

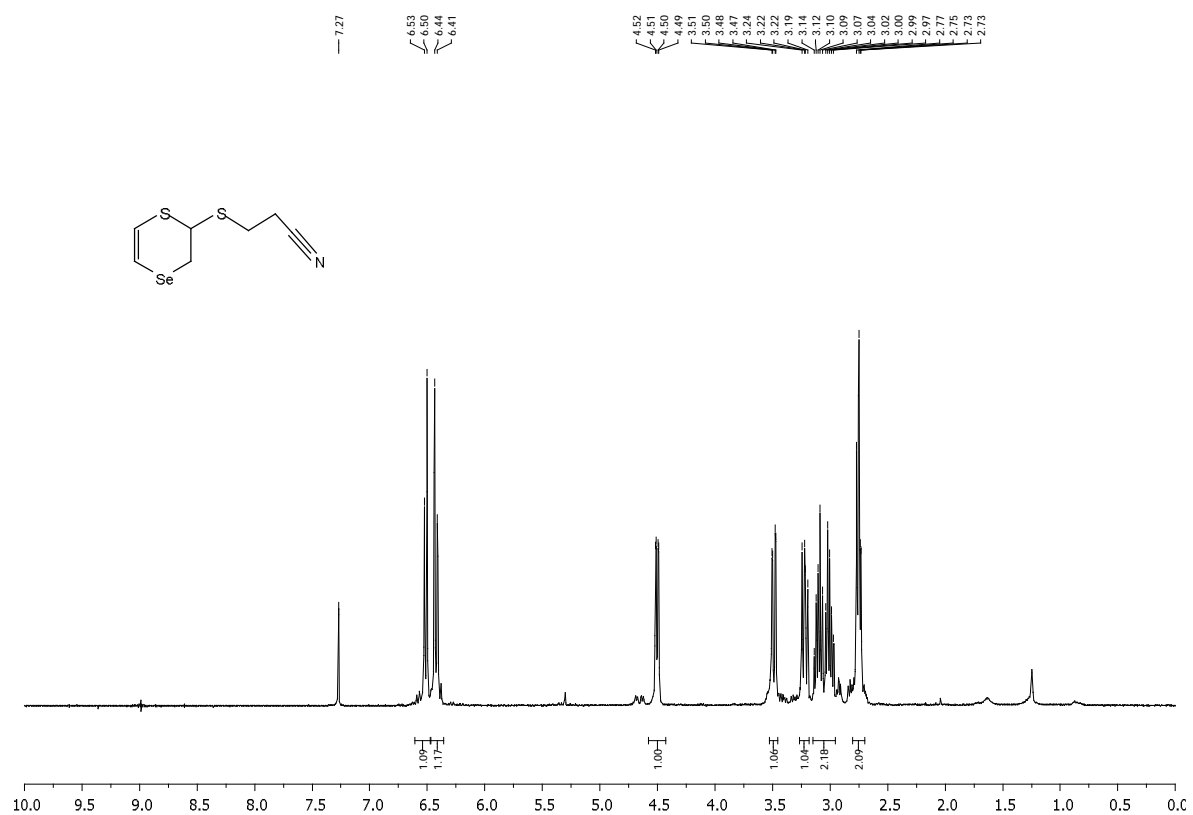

**<sup>1</sup>H-NMR spectrum of 3-(2,3-dihydro-1,4-thiaselenin-2-ylsulfanyl)propanenitrile (11)**

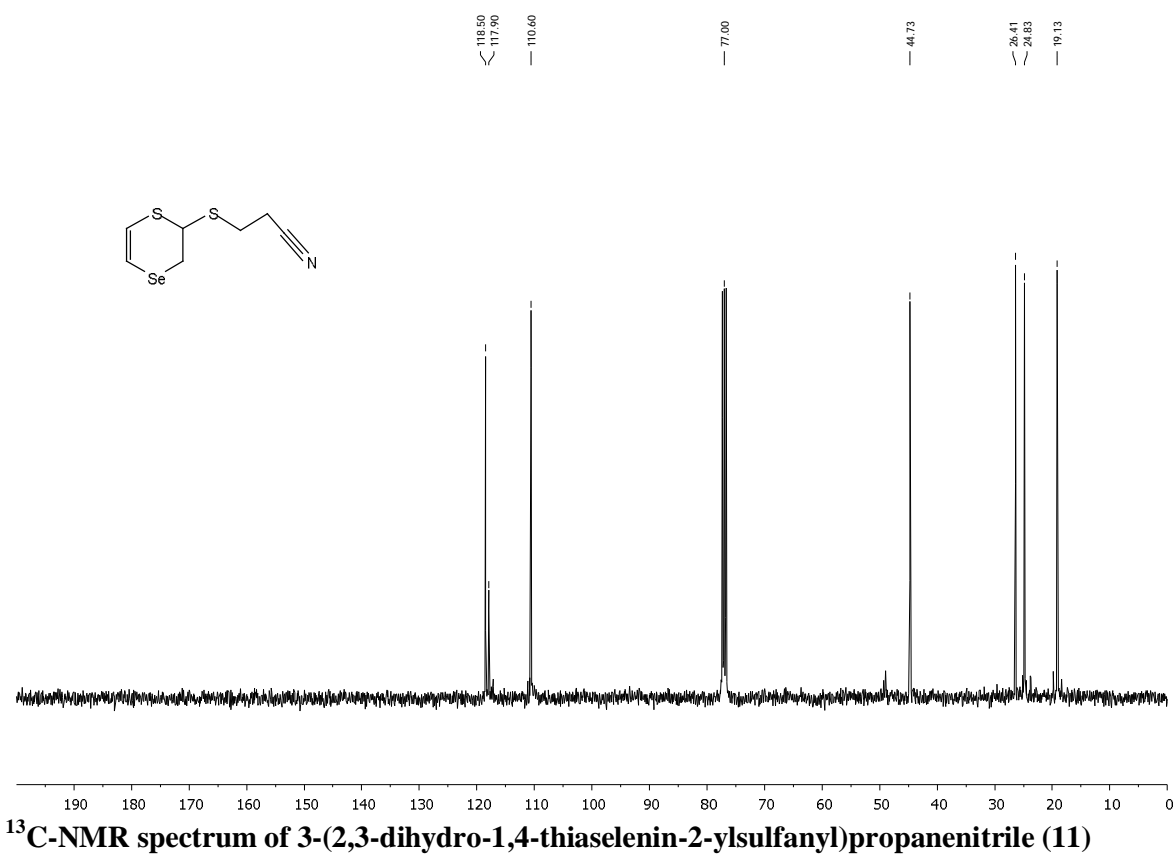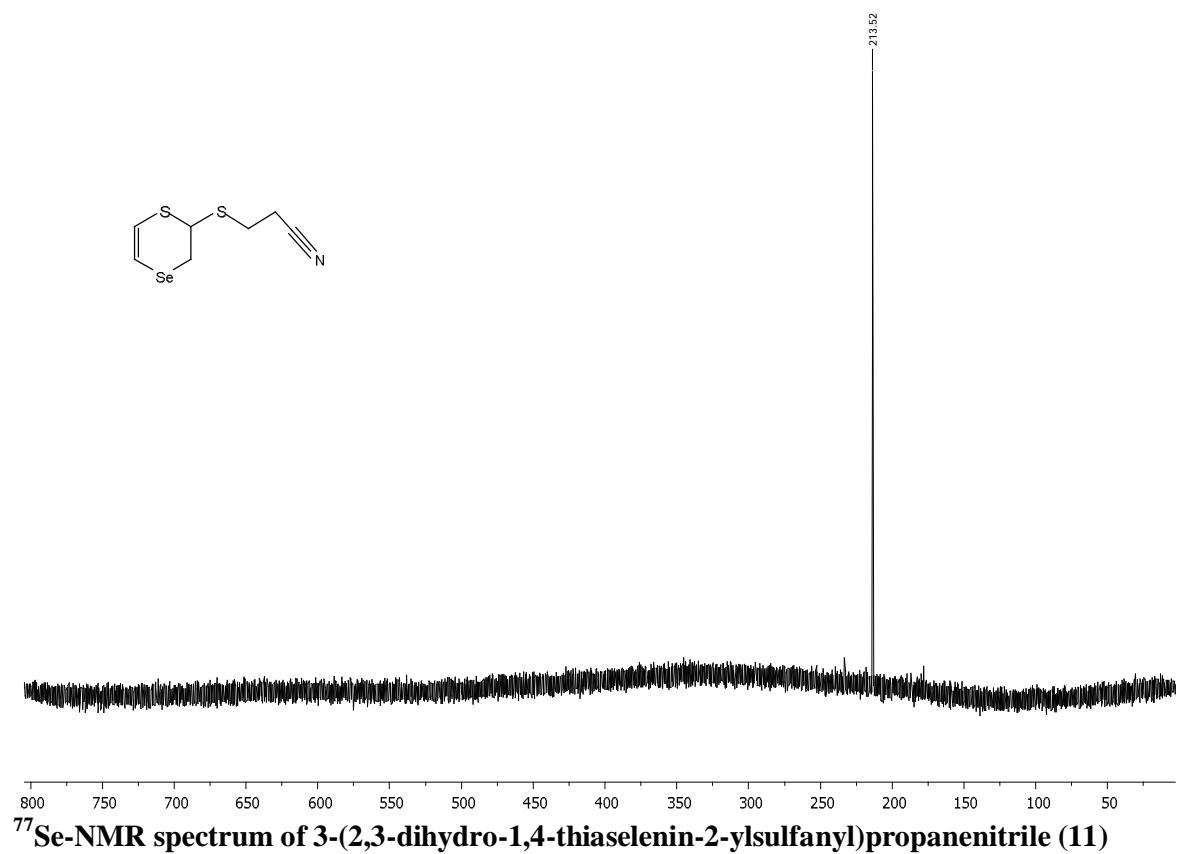

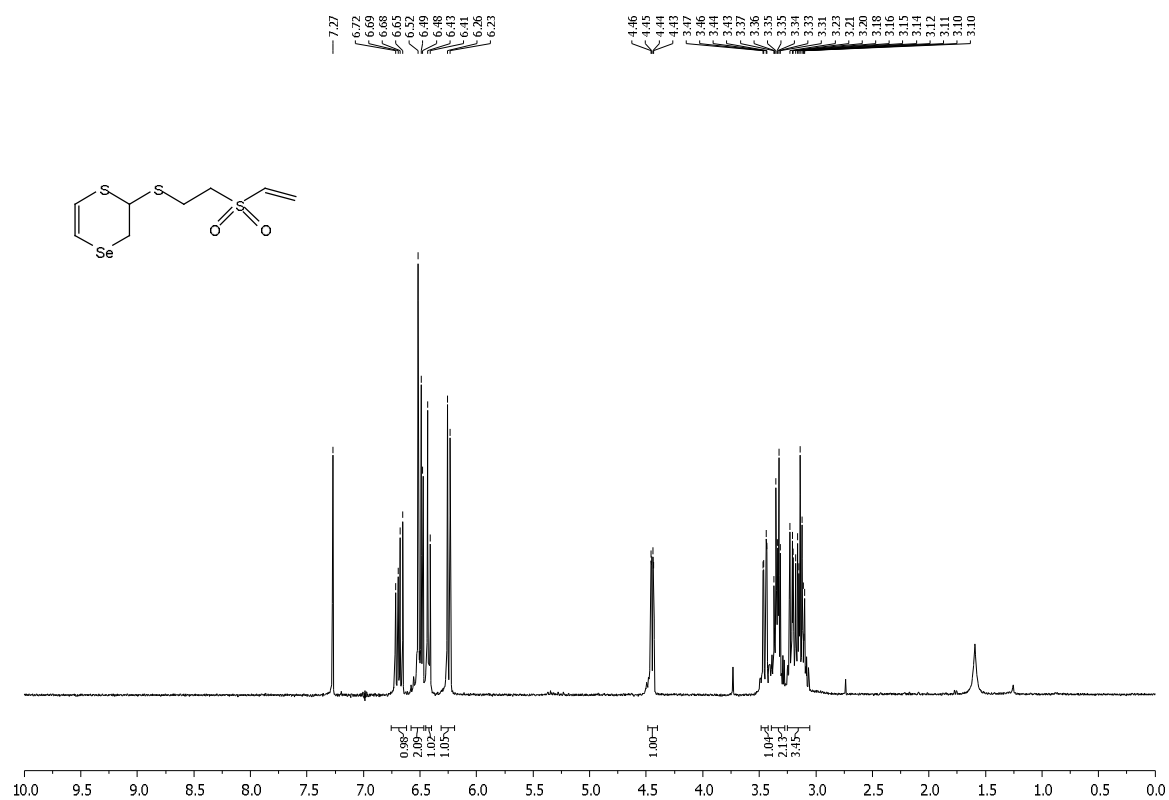

**<sup>1</sup>H-NMR spectrum of 2-(2,3-dihydro-1,4-thiaselenin-2-ylsulfanyl)ethyl vinyl sulfone (12)**

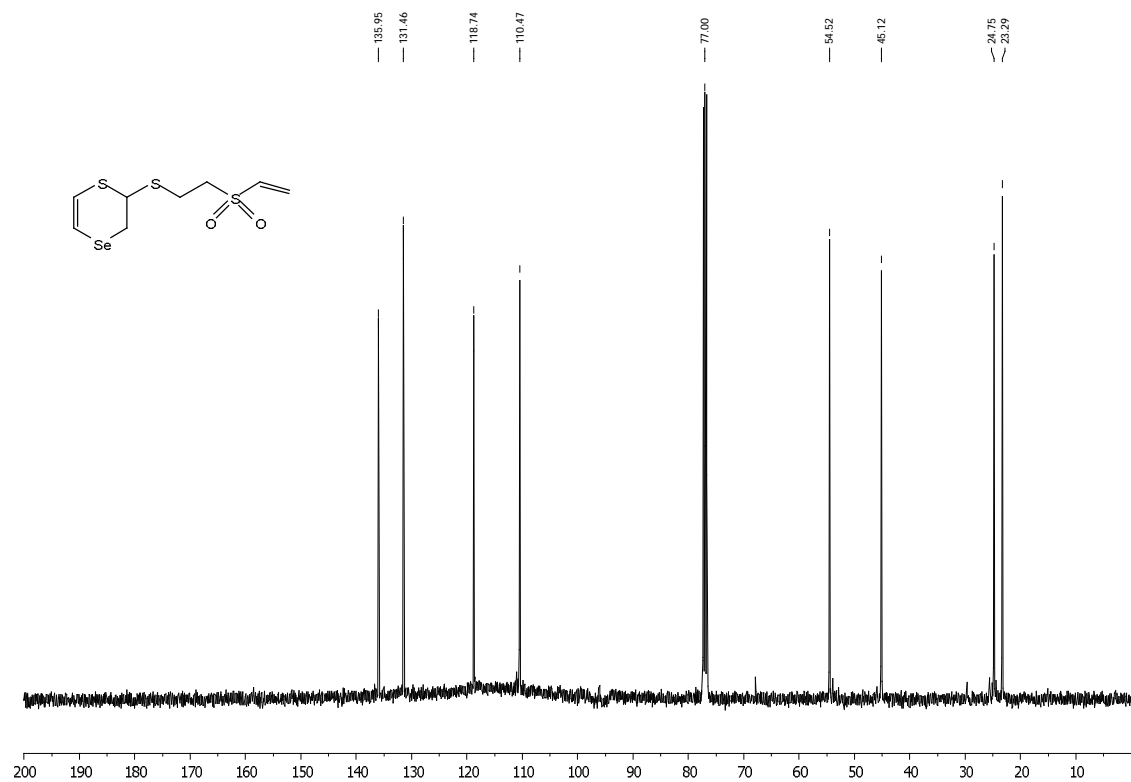

**<sup>13</sup>C-NMR spectrum of 2-(2,3-dihydro-1,4-thiaselenin-2-ylsulfanyl)ethyl vinyl sulfone (12)**

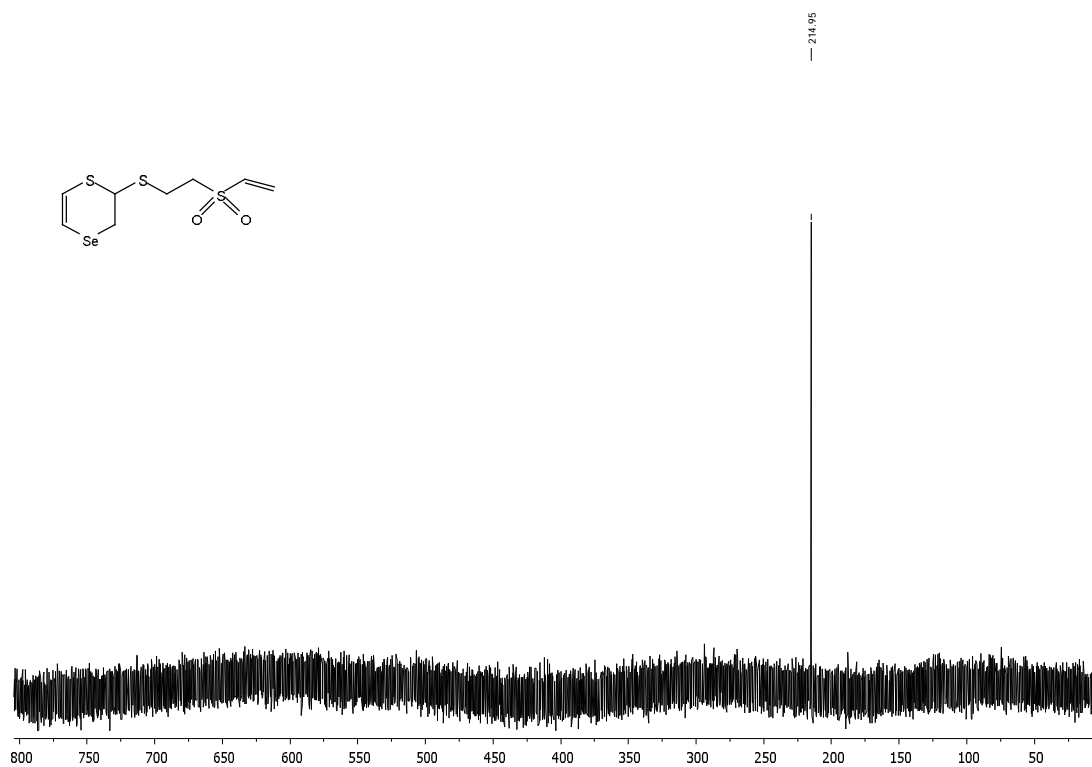

$^{77}\text{Se}$ -NMR spectrum of 2-(2,3-dihydro-1,4-thiaselenin-2-ylsulfanyl)ethyl vinyl sulfone (12)

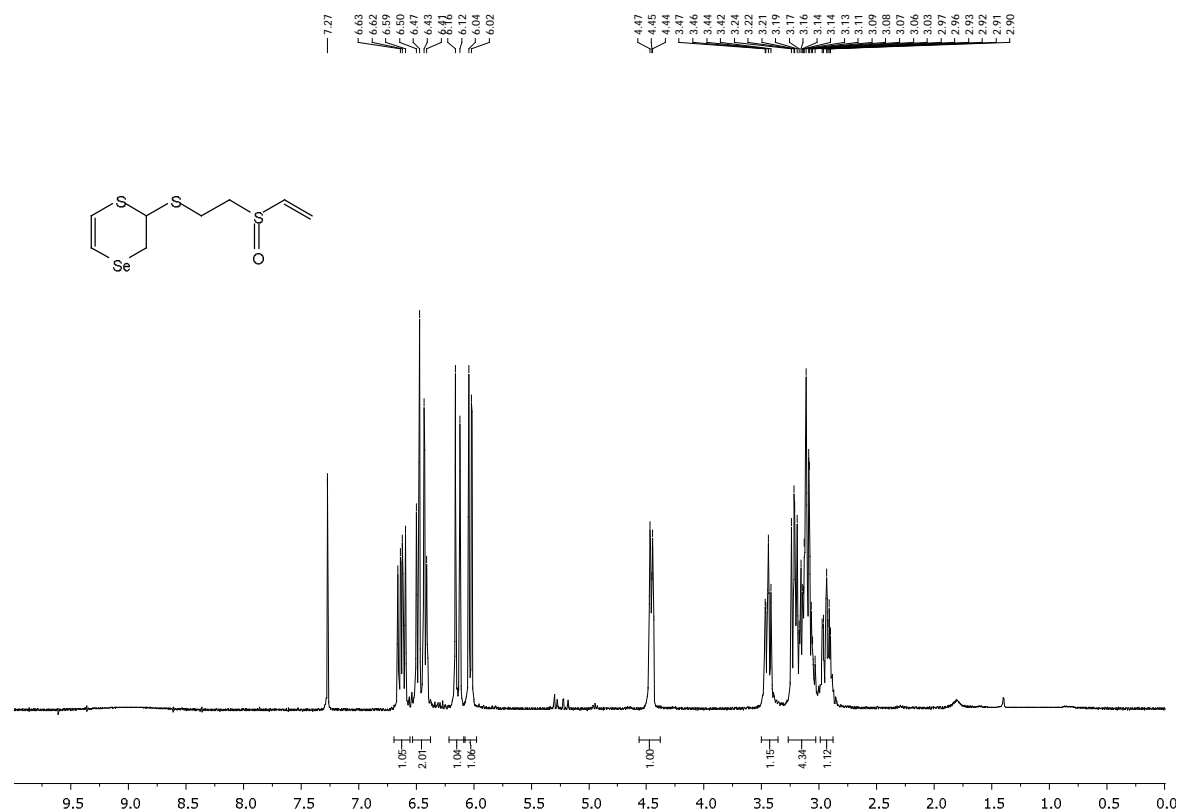

$^1\text{H}$ -NMR spectrum of 2-(2,3-dihydro-1,4-thiaselenin-2-ylsulfanyl)ethyl vinyl sulfoxide (13)



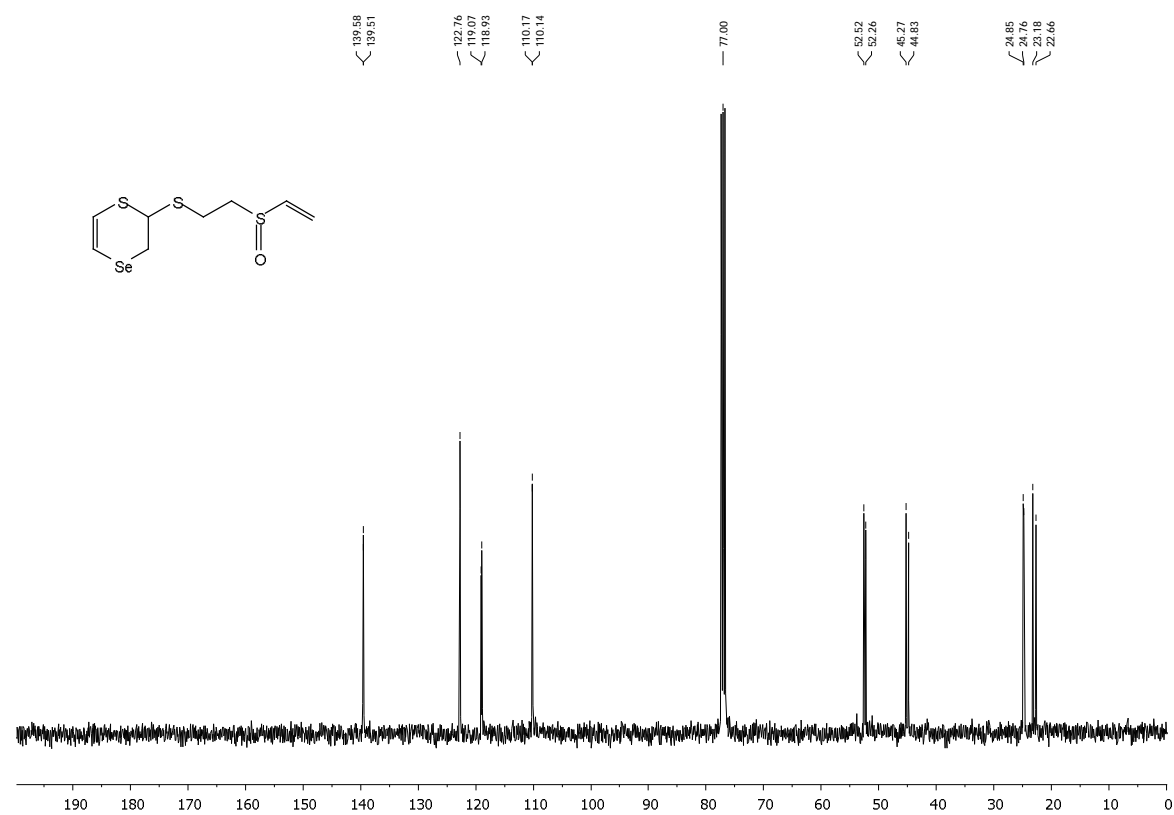

**<sup>13</sup>C-NMR spectrum of 2-(2,3-dihydro-1,4-thiaselenin-2-ylsulfanyl)ethyl vinyl sulfoxide (13)**

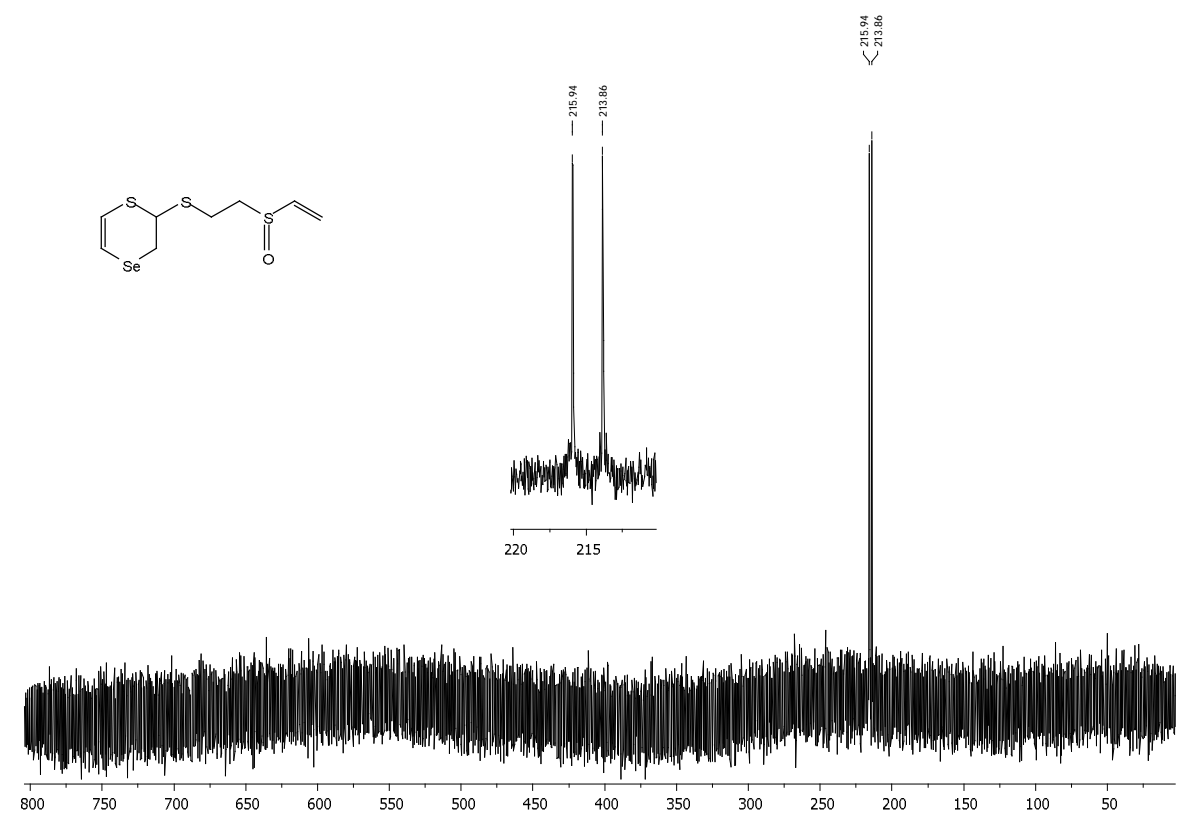

**<sup>77</sup>Se-NMR spectrum of 2-(2,3-dihydro-1,4-thiaselenin-2-ylsulfanyl)ethyl vinyl sulfoxide (13)**

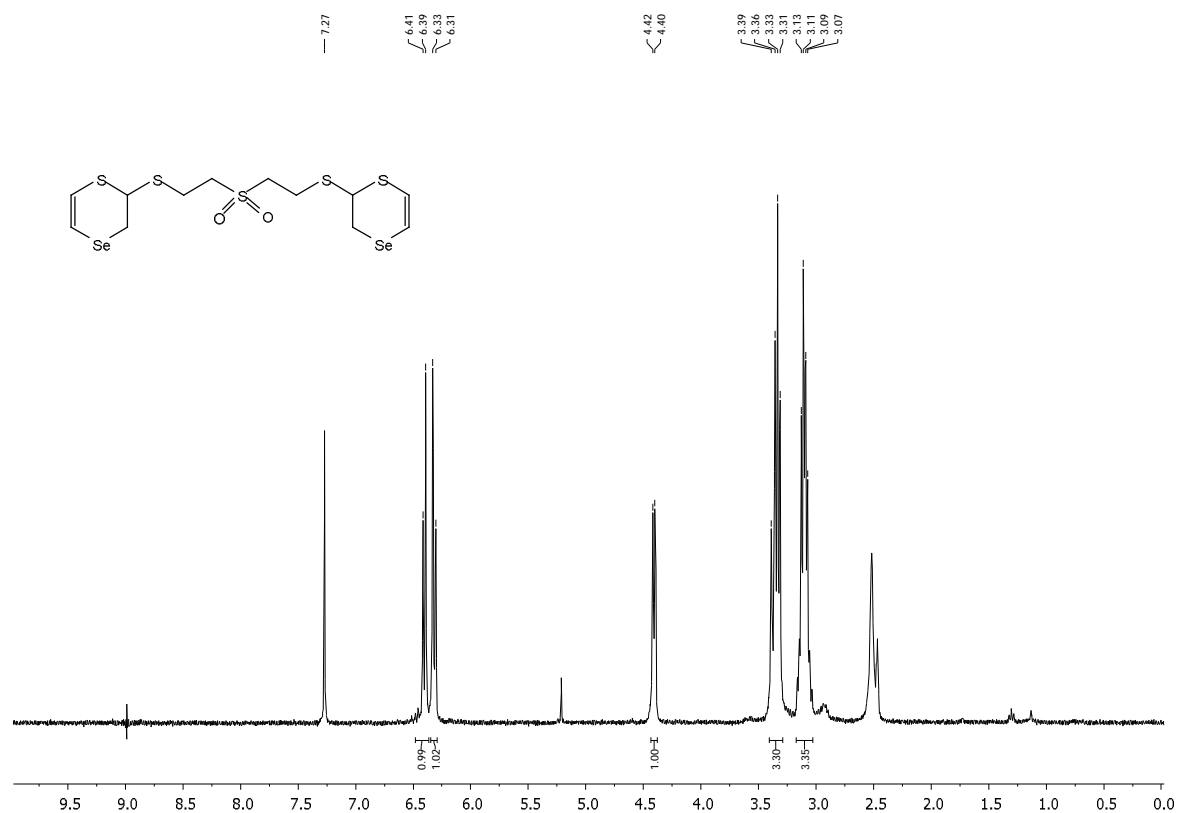

**<sup>1</sup>H-NMR spectrum of bis[2-(2,3-dihydro-1,4-thiaselenin-2-ylsulfanyl)ethyl] sulfone (14)**

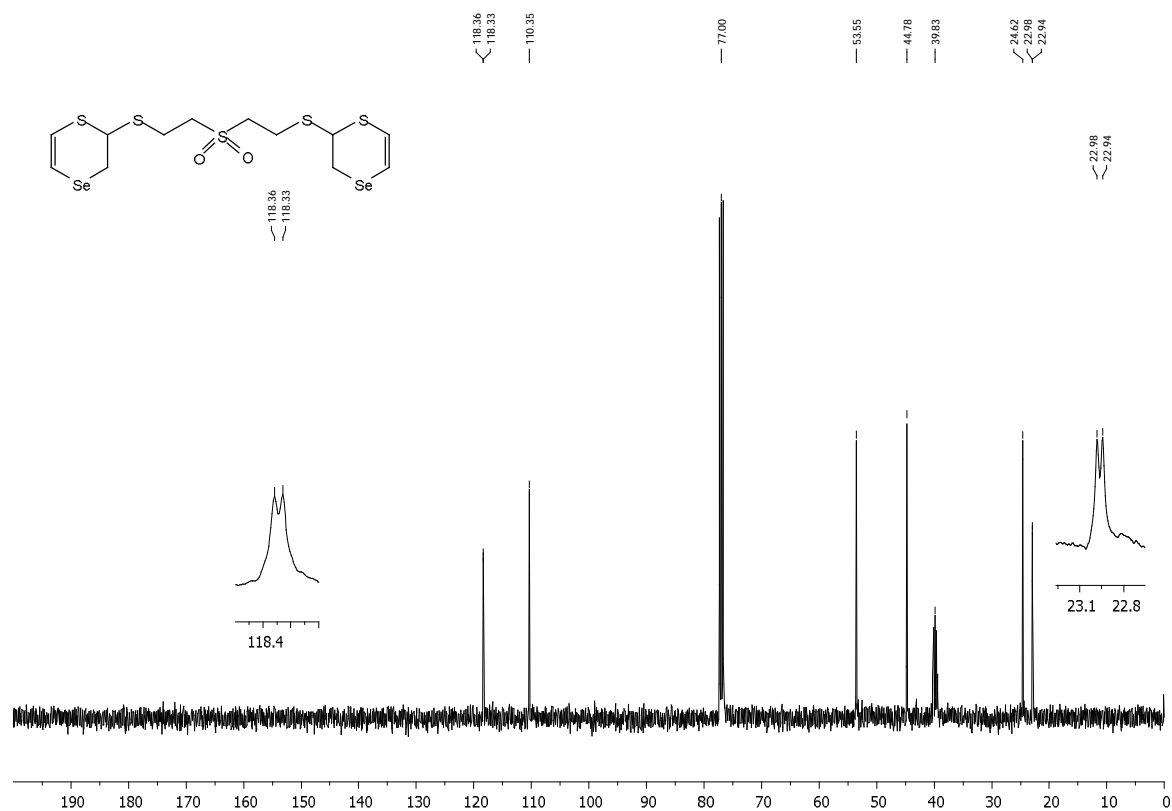

**<sup>13</sup>C-NMR spectrum of bis[2-(2,3-dihydro-1,4-thiaselenin-2-ylsulfanyl)ethyl] sulfone (14)**

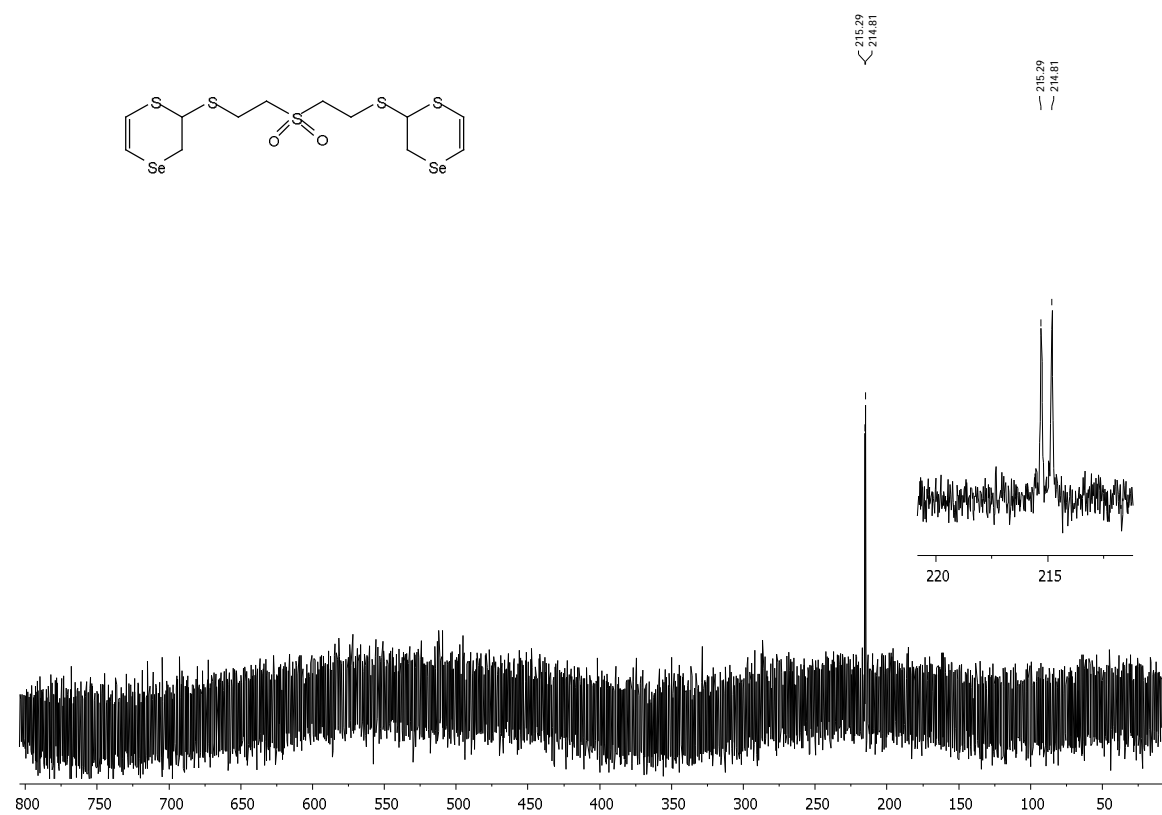

**$^{77}\text{Se}$ -NMR spectrum of bis[2-(2,3-dihydro-1,4-thiaselenin-2-ylsulfanyl)ethyl] sulfone (14)**
